# Supplementary material for: In Vivo Biodistribution and Efficacy Evaluation of NeoB, A Radiotracer Targeted to GRPR, in Mice Bearing Gastrointestinal Stromal Tumor
Source: PubMed Central journal article supplement (PMC7958597; doi:10.3390/cancers13051051), 2021-03-02
Supplement: cancers-13-01051-s001.pdf [file cancers-13-01051-s001.pdf]

# Supplementary Materials: In Vivo Biodistribution and Efficacy Evaluation of NeoB, a Radiotracer Targeted to GRPR, in Mice Bearing Gastrointestinal Stromal Tumor

Christopher Montemagno, Florian Raes, Mitra Ahmadi, Sandrine Bacot, Marlène Debiossat, Julien Leenhardt, Jean Boutonnat, Francesca Orlandi, Donato Barbato, Mattia Tedesco, Catherine Ghezzi, Pascale Perret and Alexis Broisat

**Table S1. Biodistribution of [<sup>177</sup>Lu]Lu-NeoB on GRPR-tumor bearing mice.** Biodistributions were performed at 1 h, 4 h, 24 h, 48 h, 96 h, 168 h and at 4 h when co-injected with an excess of unlabeled NeoB (4h + block). Results are expressed in mean ± SD.

|                            | 1 h  |      |   | 4 h  |     |   | 24 h |     |   | 48 h |     |   | 96 h |     |   | 168 h |     |   | 4 h + block |     |   |
|----------------------------|------|------|---|------|-----|---|------|-----|---|------|-----|---|------|-----|---|-------|-----|---|-------------|-----|---|
|                            | mean | SD   | n | mean | SD  | n | mean | SD  | n | mean | SD  | n | mean | SD  | n | mean  | SD  | n | mean        | SD  | n |
| <b>Adrenals</b>            | 5.5  | 2.0  | 5 | 1.5  | 0.5 | 4 | 0.8  | 0.3 | 5 | 0.3  | 0.2 | 6 | 0.2  | 0.2 | 5 | 0.2   | 0.1 | 5 | 0.3         | 0.1 | 5 |
| <b>Bladder</b>             | 20.6 | 19.7 | 4 | 3.1  | 3.8 | 5 | 0.1  | 0.1 | 5 | 0.1  | 0.1 | 6 | 0.0  | 0.0 | 5 | 0.0   | 0.0 | 5 | 5.9         | 8.3 | 5 |
| <b>Blood</b>               | 2.9  | 0.2  | 5 | 0.2  | 0.0 | 5 | 0.0  | 0.0 | 5 | 0.0  | 0.0 | 6 | 0.0  | 0.0 | 5 | 0.0   | 0.0 | 5 | 0.1         | 0.0 | 5 |
| <b>Bone</b>                | 0.7  | 0.3  | 5 | 0.1  | 0.0 | 5 | 0.0  | 0.0 | 5 | 0.0  | 0.0 | 6 | 0.0  | 0.0 | 5 | 0.0   | 0.0 | 5 | 0.1         | 0.0 | 5 |
| <b>GIST tumor</b>          | 21.6 | 1.7  | 5 | 19.1 | 3.9 | 5 | 13.4 | 3.5 | 5 | 10.5 | 1.6 | 6 | 5.9  | 0.3 | 5 | 2.2   | 0.7 | 5 | 0.3         | 0.1 | 5 |
| <b>Heart</b>               | 1.0  | 0.2  | 5 | 0.1  | 0.0 | 5 | 0.0  | 0.0 | 5 | 0.0  | 0.0 | 6 | 0.0  | 0.0 | 5 | 0.0   | 0.0 | 5 | 0.1         | 0.0 | 5 |
| <b>Kidneys</b>             | 6.1  | 0.3  | 5 | 1.8  | 0.4 | 5 | 0.4  | 0.1 | 5 | 0.1  | 0.0 | 6 | 0.1  | 0.0 | 5 | 0.0   | 0.0 | 5 | 2.0         | 0.6 | 5 |
| <b>Large bowel</b>         | 2.8  | 0.6  | 5 | 2.0  | 0.4 | 5 | 0.4  | 0.2 | 5 | 0.1  | 0.0 | 6 | 0.1  | 0.0 | 5 | 0.0   | 0.0 | 5 | 0.6         | 0.6 | 5 |
| <b>Large bowel content</b> | 1.1  | 1.2  | 5 | 10.0 | 3.5 | 5 | 1.3  | 1.0 | 5 | 0.4  | 0.3 | 6 | 0.4  | 0.4 | 5 | 0.3   | 0.2 | 5 | 10.0        | 8.8 | 5 |
| <b>Liver</b>               | 5.8  | 1.1  | 5 | 0.7  | 0.1 | 5 | 0.3  | 0.1 | 5 | 0.2  | 0.0 | 6 | 0.2  | 0.0 | 5 | 0.1   | 0.0 | 5 | 0.6         | 0.1 | 5 |
| <b>Lungs</b>               | 2.3  | 0.4  | 5 | 0.2  | 0.1 | 5 | 0.0  | 0.0 | 5 | 0.1  | 0.1 | 6 | 0.0  | 0.0 | 5 | 0.0   | 0.0 | 5 | 0.2         | 0.1 | 5 |
| <b>Pancreas</b>            | 19.8 | 2.6  | 5 | 8.5  | 2.0 | 5 | 1.1  | 0.4 | 5 | 0.2  | 0.0 | 6 | 0.0  | 0.0 | 5 | 0.0   | 0.0 | 5 | 0.1         | 0.0 | 5 |

|                            |       |       |   |       |       |   |     |     |   |     |     |   |     |     |   |     |     |   |       |       |   |
|----------------------------|-------|-------|---|-------|-------|---|-----|-----|---|-----|-----|---|-----|-----|---|-----|-----|---|-------|-------|---|
| <b>Small bowel</b>         | 3.9   | 1.0   | 5 | 1.8   | 0.7   | 5 | 0.3 | 0.1 | 5 | 0.1 | 0.0 | 6 | 0.0 | 0.0 | 5 | 0.0 | 0.0 | 5 | 0.3   | 0.1   | 5 |
| <b>Small bowel content</b> | 5.1   | 2.9   | 5 | 0.8   | 0.3   | 5 | 0.1 | 0.1 | 5 | 0.0 | 0.0 | 6 | 0.0 | 0.0 | 5 | 0.0 | 0.0 | 5 | 0.4   | 0.2   | 5 |
| <b>Spleen</b>              | 1.2   | 0.2   | 5 | 0.3   | 0.1   | 5 | 0.1 | 0.1 | 5 | 0.1 | 0.0 | 6 | 0.0 | 0.0 | 5 | 0.1 | 0.1 | 5 | 0.3   | 0.1   | 4 |
| <b>Skeletal muscle</b>     | 0.4   | 0.0   | 5 | 0.1   | 0.0   | 5 | 0.0 | 0.0 | 5 | 0.0 | 0.0 | 6 | 0.0 | 0.0 | 5 | 0.0 | 0.0 | 5 | 0.0   | 0.0   | 5 |
| <b>Stomach</b>             | 3.7   | 1.0   | 5 | 1.9   | 0.6   | 5 | 0.7 | 0.2 | 5 | 0.3 | 0.1 | 6 | 0.1 | 0.1 | 5 | 0.0 | 0.0 | 5 | 0.2   | 0.1   | 5 |
| <b>Urine</b>               | 600.2 | 155.4 | 5 | 215.5 | 192.9 | 5 | 1.9 | 1.1 | 5 | 0.9 | 0.5 | 6 | 0.3 | 0.1 | 5 | 0.2 | 0.2 | 5 | 116.4 | 146.8 | 5 |

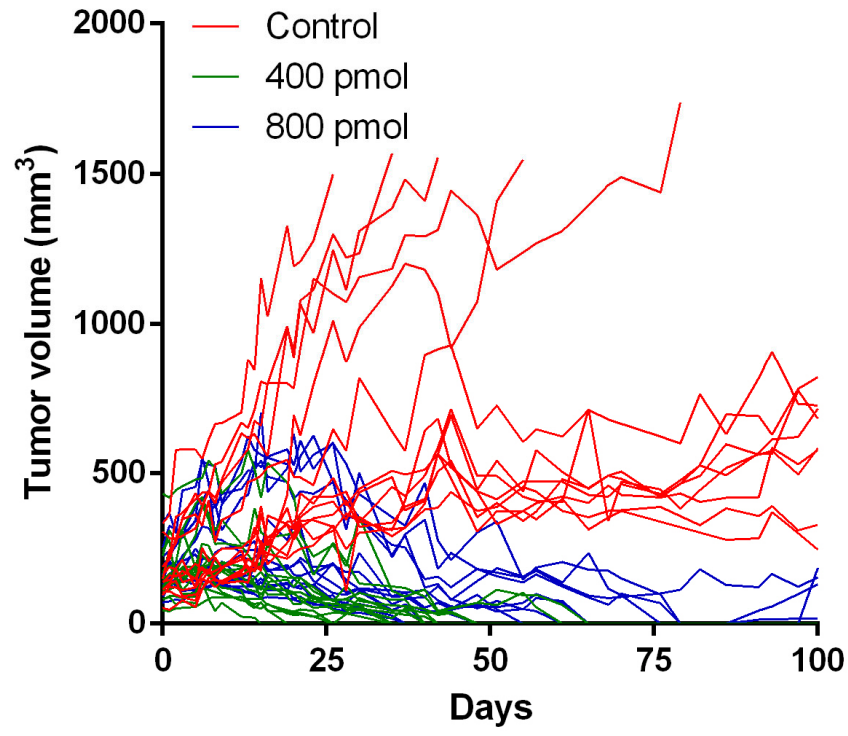

**Figure S1.** Individual tumor growth curves from efficacy sub-study. Tumor volumes were determined up to 100 days following the onset of the therapy. Mice with tumor reaching 1500mm<sup>3</sup> were excluded from the study. Data are expressed in mm<sup>3</sup>.
